# Supplementary material for: Amniotic membrane transplantation for ocular disease: a review of the first 233 cases from the UK user group
Source: HighWire-hosted journal article supplement (doi:10.1136/bjo.2006.098525), 2007-02-21
Supplement: 9181042webonlyapp1.pdf [file 9181042webonlyapp1.pdf]

**Appendix 1 Amniotic membrane transplant registration & 3 month follow up form**

**Amniotic membrane transplant registration form**

|                                  |                                                                    |   |                          |                                                                    |   |
|----------------------------------|--------------------------------------------------------------------|---|--------------------------|--------------------------------------------------------------------|---|
| Centre.....                      | <input type="text"/>                                               | 1 | Surgeon.....             | <input type="text"/>                                               | 6 |
| Membrane no.....                 | <input type="text"/>                                               | 2 | Patient number.....      | <input type="text"/>                                               | 7 |
| Date of procedure (dd/mm/yyyy)   | <input type="text"/> / <input type="text"/> / <input type="text"/> | 3 | D.O.B. (dd/mm/yyyy)..... | <input type="text"/> / <input type="text"/> / <input type="text"/> | 8 |
| Eye (One form for each eye)..... | <input type="text"/> R <input type="text"/> L                      | 4 | Sex .....                | <input type="text"/> male <input type="text"/> female              | 9 |
| Preop Snellen VA.....            | <input type="text"/>                                               | 5 |                          |                                                                    |   |

**Indications/  
underlying conditions**

**Limbal stem cell deficiency**

|                |                          |    |                          |    |
|----------------|--------------------------|----|--------------------------|----|
| Sectoral ..... | <input type="checkbox"/> | or | <input type="checkbox"/> | 10 |
| Mosaic .....   | <input type="checkbox"/> | or | <input type="checkbox"/> | 11 |
| Total .....    | <input type="checkbox"/> | or | <input type="checkbox"/> | 12 |

**Ocular surface reconstruction**

|                                              |                          |    |
|----------------------------------------------|--------------------------|----|
| Lesion excision: neoplasia.....              | <input type="checkbox"/> | 13 |
| Lesion excision: pterygium.....              | <input type="checkbox"/> | 14 |
| Lesion excision: other (state).....          | <input type="checkbox"/> | 15 |
| Conjunctival cicatrix: OCP.....              | <input type="checkbox"/> | 16 |
| Conjunctival cicatrix: Stevens Johnson ..... | <input type="checkbox"/> | 17 |
| Conjunctival cicatrix: other (state).....    | <input type="checkbox"/> | 18 |
| .....                                        | <input type="checkbox"/> | 19 |
| Aniridia.....                                | <input type="checkbox"/> | 19 |
| Other (please state).....                    | <input type="checkbox"/> | 20 |

**Chemical/ Thermal injury (grades)**

|                                                                                           |                          |    |
|-------------------------------------------------------------------------------------------|--------------------------|----|
| Acid injury.....                                                                          | <input type="checkbox"/> | 21 |
| Alkali injury.....                                                                        | <input type="checkbox"/> | 22 |
| Thermal injury.....                                                                       | <input type="checkbox"/> | 23 |
| Time from injury to AMT (months (1wk=0.25))                                               | <input type="checkbox"/> | 24 |
| 1) epithelial defect, no ischaemia.....                                                   | <input type="checkbox"/> | 25 |
| 2) hazy cornea, iris details seen, <1/3 limbal ischaemia.....                             | <input type="checkbox"/> | 26 |
| 3) total epith defect, stromal haze obscuring iris details, 1/3-1/2 limbal ischaemia..... | <input type="checkbox"/> | 27 |
| 4) iris obscured, >1/2 limbal ischaemia.....                                              | <input type="checkbox"/> | 28 |

**Persistent epithelial defect**

|                                         |                          |    |
|-----------------------------------------|--------------------------|----|
| Epithelial basement membrane dystrophy  | <input type="checkbox"/> | 29 |
| Diabetic autonomic neuropathy.....      | <input type="checkbox"/> | 30 |
| KCS/ Sjogrens .....                     | <input type="checkbox"/> | 31 |
| Lid anomalies: lagophthalmos/ exposure  | <input type="checkbox"/> | 32 |
| Lid anomalies: trichiasis.....          | <input type="checkbox"/> | 33 |
| Iatrogenic (medicamentosa).....         | <input type="checkbox"/> | 34 |
| Trauma (chemical burns, artefacta)..... | <input type="checkbox"/> | 35 |
| Neurogenic: post-op.....                | <input type="checkbox"/> | 36 |
| Neurogenic: congenital.....             | <input type="checkbox"/> | 37 |
| Neurogenic: zoster / simplex.....       | <input type="checkbox"/> | 38 |
| Infection: current.....                 | <input type="checkbox"/> | 39 |
| Infection: post infectious).....        | <input type="checkbox"/> | 40 |
| Inflammation: OCP .....                 | <input type="checkbox"/> | 41 |
| Inflammation: Stevens Johnson.....      | <input type="checkbox"/> | 42 |
| Inflammation: other (state).....        | <input type="checkbox"/> | 43 |
| Nutritional (xerophthalmia).....        | <input type="checkbox"/> | 44 |

**Bullous keratopathy**

|                                  |                          |    |
|----------------------------------|--------------------------|----|
| Post surgical or traumatic.....  | <input type="checkbox"/> | 45 |
| Fuchs endothelial dystrophy..... | <input type="checkbox"/> | 46 |

**Trabeculectomy**

|                                                      |                          |    |
|------------------------------------------------------|--------------------------|----|
| .....                                                | <input type="checkbox"/> | 47 |
| <b><u>Any other proposed purpose(s) (state):</u></b> |                          |    |
| .....                                                |                          |    |
| .....                                                |                          | 48 |

**Previous treatment**

|                         |                          |                          |
|-------------------------|--------------------------|--------------------------|
|                         | Preserved                | Unpreserved              |
| Lubrication.....        | <input type="checkbox"/> | <input type="checkbox"/> |
| Hypertonic agents ..... | <input type="checkbox"/> | <input type="checkbox"/> |
| Topical steroids.....   | <input type="checkbox"/> | <input type="checkbox"/> |
| Serum drops.....        | <input type="checkbox"/> | <input type="checkbox"/> |
| Systemic steroids.....  | <input type="checkbox"/> | <input type="checkbox"/> |
| PTK.....                | <input type="checkbox"/> | <input type="checkbox"/> |

|                                   |                          |    |
|-----------------------------------|--------------------------|----|
| Therapeutic contact lens.....     | <input type="checkbox"/> | 60 |
| Epithelial scrape.....            | <input type="checkbox"/> | 61 |
| Epithelial scrape and polish..... | <input type="checkbox"/> | 62 |
| Other(s) (state).....             |                          |    |
| .....                             |                          |    |
| .....                             |                          | 63 |
| Duration previous Rx (weeks)..... | <input type="text"/>     | 64 |

## Appendix 1 Amniotic membrane transplant registration & 3 month follow up form

### Operative technique (categories not exclusive)

1. Amniotic membrane (AM) epithelial basement membrane (AMBM) ( ) (e.g. BM side up PED, limbal stem cell deficiency, conjunctival grafting): sutured within confines of defect..... 65
  2. AM epithelial basement membrane (BM side up): edges buried under epithelial source..  66
  3. AM epithelial basement membrane (BM side up): edges within limbus (e.g. PBK).....  67
  4. AM biological bandage (AMBB)(stromal side down) (e.g. over a PED)..... 68
  5. AM mechanical bandage (AMMB) (e.g. over a trabeculectomy bleb) ..... 69
  6. AM anti-inflammatory explant (AMAIE) (e.g. chemical burns)..... 70
  7. Other (state)..... 71
- Stromal/card side  up or  down  72
- Suture size...../0  73
- Suture material: vicryl..... 74
- Suture material: nylon..... 75
- Number of sutures..... 76
- Suture style: interrupted..... 77
- Suture style:continuous..... 78
- Bandage contact lens..... 79
- Other..... 80

### Ancillary procedures

- Superficial keratectomy..... 81
- Lamellar keratoplasty..... 82
- Penetrating keratoplasty..... 83
- Limbal stem cell allograft.....  84
- Limbal stem cell autograft..... 85
- Antimetabolites: MMC..... 86
- Antimetabolites: 5FU)..... 87
- Other(s) (state)..... 88

Comments/ sketch of procedure if not described above (completion optional)

89

## Appendix 1 Amniotic membrane transplant registration & 3 month follow up form

### Amniotic membrane users' group transplant follow up form

|                                |                                                                    |   |                          |                                                                    |   |
|--------------------------------|--------------------------------------------------------------------|---|--------------------------|--------------------------------------------------------------------|---|
| Centre.....                    | <input type="text"/>                                               | 1 | Surgeon.....             | <input type="text"/>                                               | 6 |
| Membrane no.....               | <input type="text"/>                                               | 2 | Patient number.....      | <input type="text"/>                                               | 7 |
| Date of procedure (dd/mm/yyyy) | <input type="text"/> / <input type="text"/> / <input type="text"/> | 3 | D.O.B. (dd/mm/yyyy)..... | <input type="text"/> / <input type="text"/> / <input type="text"/> | 8 |
| Eye .....                      | <input type="text"/> R <input type="text"/> L                      | 4 | Sex                      | <input type="text"/> male <input type="text"/> female              | 9 |
| Preop Snellen VA.....          | <input type="text"/>                                               | 5 |                          |                                                                    |   |

### Postoperative treatment

|                                |                                  |                             |                                   |                              |
|--------------------------------|----------------------------------|-----------------------------|-----------------------------------|------------------------------|
|                                | Preserved                        | Unpreserved                 |                                   |                              |
| Lubrication.....               | <input type="checkbox"/> 90..... | <input type="checkbox"/> 91 | PTK.....                          | <input type="checkbox"/> 100 |
| Hypertonic agents .....        | <input type="checkbox"/> 92..... | <input type="checkbox"/> 93 | Therapeutic contact lens.....     | <input type="checkbox"/> 101 |
| Topical steroids.....          | <input type="checkbox"/> 94..... | <input type="checkbox"/> 95 | Epithelial scrape.....            | <input type="checkbox"/> 102 |
| Serum drops.....               | <input type="checkbox"/> 96..... | <input type="checkbox"/> 97 | Bowman's membrane polish.....     | <input type="checkbox"/> 103 |
| Systemic steroids.....         | <input type="checkbox"/> 98..... |                             | Other.....                        | <input type="checkbox"/> 104 |
| Other immunomodulatory Rx..... | <input type="checkbox"/> 99      |                             | Duration previous Rx (weeks)..... | <input type="text"/> 105     |

### 3 months follow up

#### PED

Stable, healed surface.....  106  
 Healed and broken down (unstable).....  107  
 Almost healed.....  108  
 Not healed.....  109

#### PBK

Pain free.....  110  
 No bullae.....  111  
 Stable surface.....  112  
 Unstable surface.....  113

#### Limbal stem cell deficiency

Corneal phenotype.....  or  114  
 Conjunctival phenotype.....  or  115

#### Ocular surface reconstruction

Conjunctival cicatrisation.....  116  
 No/ minimal cicatrisation.....  116  
 Conjunctiva epithelialised & uninfamed...  117  
 Conjunctival epithelialised & inflamed....  118  
 Conjunctiva not epithelialised.....  119

#### Chemical injury

Inflammation.....  120

Less inflammation.....  121  
 No inflammation.....  122  
 Corneal epithelium healed and stable.....  123  
 Corneal epithelium largely healed.....  124  
 Corneal epithelium healed then broke down.  125  
 Corneal epithelium not healed.....  126  
 Corneal stroma clear.....  127  
 Corneal stroma clearer.....  128  
 Corneal stroma still hazy.....  129  
 Less limbal ischaemia.....  130  
 Unchanged limbal ischaemia.....  131

#### Trabeculectomy

Trabeculectomy: IOP control.....  132  
 Trabeculectomy: IOP not controlled.....  133  
 Bleb uninflamed.....  134

Snellen VA at 3 months:.....  135

Other clinical observations.....  
 .....  
 .....  
 ..... 136

**Appendix 1 Amniotic membrane transplant registration & 3 month follow up form**
