# Supplementary material for: Amniotic membrane transplantation for ocular disease: a review of the first 233 cases from the UK user group
Source: HighWire-hosted journal article supplement (doi:10.1136/bjo.2006.098525), 2007-02-21
Supplement: 9181042webonlyapp2.pdf [file 9181042webonlyapp2.pdf]

## Online only material Appendices 2-4

### Appendix 2. Amniotic Membrane Tissue User Group

#### *Consultant Ophthalmologists*

Mr B Allan MD,FRCS,FRCOphth<sup>1</sup>, Prof W J Armitage BSc PhD<sup>2</sup>, Mr A Azuaro-Blanco PhD FRCS(Ed)<sup>3</sup>, Mr K Barton MD FRCP FRCS FRCOphth<sup>1</sup>, Miss M Beaconsfield MBBS DO FRCS FRCOphth<sup>1</sup>, Mr A Brahma MBChB,MD,FRCOphth<sup>4</sup>, Prof A Bron BSc FRCS FRCOphth FMed Sci<sup>5</sup>,Mr C K-S Chew MSc DRCOG FRCS FRCOphth<sup>6</sup>, Mr S D Cook MBChB PhD FRCOphth<sup>2</sup>, Miss M Corbett MBBS MD FRCS FRCOphth<sup>7</sup>, Mr E A Craig MBChB DO FRCOphth<sup>8</sup>, Mr J K G Dart MA BM BCh DM FRCS FRCOphth<sup>1</sup>, Mr S Daya FRCOphth DO MD FRCS<sup>9</sup>, Mr R DeCock MBChB BSc FRCS FRCOphth<sup>10</sup>, Mr H S Dua MBBS DO MS MNAMS FRCSEd FRCOphth MD PhD<sup>11</sup>, Dr O Earley MB BCh MD FRCOphth<sup>12</sup>, Mr M P Edwards MBChB FRCOphth<sup>13</sup>, Mr G Fahy FRCS FRCOphth<sup>14</sup>, Miss L Ficker BSc FRCS FRCOphth<sup>1</sup>, Mr F C D Figueiredo MD PhD FRCOphth<sup>15</sup>, Mr J M Hayward FRCS FRCOphth<sup>16</sup>, Mr C D Illingworth MBChB BSc MD FRCS<sup>17</sup>, Mr N Joshi DO FRCOphth<sup>18</sup>, Mr S B Kaye MD FRCS FRCOphth<sup>19</sup>, Miss A Kerr MBBS FRCS<sup>20</sup>, Mr C M Kirkness BMed Biol MBChB FRCS FRCOphth DEBO<sup>21</sup>, Mr C Liu BSc MBBS DO FRCOphth FHKAM<sup>22</sup>, Mr J McGill BM BCh MA DPhil FRCS FRCOphth<sup>23</sup>, Mr S J Morgan DO MD FRCS FRCOphth<sup>24</sup>, Mr A J Morrell MBChB FRCS FRCOphth<sup>25</sup>, Mr B Noble MBBS FRCS FRCOphth<sup>26</sup>, Mr D O'Brart BSc DO MD FRCS FRCOphth<sup>27</sup>, Mr M J P Potts MBChB PhD FRCS FRCOphth<sup>2</sup>, Mr J Prydal MBBS FRCOphth MD PhD<sup>14</sup>, Mr A Ramsay BSc MBBS FRCOphth<sup>28</sup>, Mr J A Scott BSc MBBS MRCOphth FRCS<sup>29</sup>, Mr P Shah BSc MBChB FRCOphth<sup>30</sup>, Mr P R Simcock MBChB DO FRCS MRCP FRCOphth<sup>31</sup>, Mr D M Tole MBChB MRCGP FRCOphth<sup>2</sup>, Mr S J Tuft MA MChir MD FRCOphth<sup>1</sup>, Mr A Tullo MD FRCOphth<sup>4</sup>, Mr A Vijaykumar MBBS DO FRCS FRCOphth<sup>32</sup>.

#### *Affiliations:*

- 1 Moorfields Eye Hospital
2. Bristol Eye Hospital
3. Aberdeen Royal Infirmary
4. Manchester Royal Eye Hospital
5. Radcliffe Infirmary, Oxford Eye Hospital
6. Wolverhampton Eye Infirmary
7. Western Ophthalmic Hospital, London
8. Royal Shrewsbury Hospital
9. Queen Victoria Hospital, East Grinstead
10. William Harvey Hospital, Kent
11. Queen's Medical Centre, Nottingham
12. Mater Hospital, Belfast
13. Royal Hallamshire Hospital, Sheffield
14. Leicester Royal Infirmary
15. Royal Victoria Infirmary, Newcastle
16. York District Hospital

17. Norfolk & Norwich University Hospital
18. Chelsea & Westminster Hospital, London
19. St Paul's Eye Unit, Liverpool
20. Northampton General Hospital
21. Gartnavel Hospital, Glasgow
22. Sussex Eye Hospital
23. Southampton Eye Unit, Southampton
24. Sunderland Eye Infirmary
25. St James University Hospital, Leeds
26. Leeds General Infirmary
27. St Thomas's Hospital, London
28. West Suffolk Hospital, Bury St Edmunds
29. Stirling Royal Infirmary, Scotland
30. Birmingham & Midland Eye Centre
31. Royal Devon & Exeter Hospital
32. Blackburn Royal Infirmary / Burnley General Hospital

**Appendix 3.** Treatment received prior to amniotic membrane transplantation

| <b>Previous Treatment</b>                  | <b>PED<br/>n = 88<br/>(% of n)</b> | <b>LSCD<br/>n = 34<br/>(% of n)</b> | <b>OSR<br/>n = 67<br/>(% of n)</b> | <b>CHEM<br/>n = 42<br/>(% of n)</b> | <b>BK<br/>n = 42<br/>(% of n)</b> | <b>TRAB<br/>n = 2<br/>(% of n)</b> | <b>OTHER<br/>n = 11<br/>(% of n)</b> | <b>All procedures<br/>n=233<br/>(% of n)</b> |
|--------------------------------------------|------------------------------------|-------------------------------------|------------------------------------|-------------------------------------|-----------------------------------|------------------------------------|--------------------------------------|----------------------------------------------|
| Lubrication unpreserved<br>preserved       | 44 (50.0)<br>12 (13.6)             | 18 (52.9)<br>8 (23.5)               | 19 (28.4)<br>9 (13.4)              | 11 (26.2)<br>5 (11.9)               | 10 (23.8)<br>18 (42.9)            | 0<br>0                             | 5 (45.5)<br>1 (9.1)                  | <b>84 (36.1)</b><br><b>40 (17.2)</b>         |
| Hypertonic agents unpreserved<br>preserved | 4 (4.6)<br>1 (1.1)                 | 2 (5.9)<br>2 (5.9)                  | 1 (1.5)<br>0                       | 0<br>0                              | 3 (7.1)<br>10 (23.8)              | 0<br>0                             | 0<br>0                               | <b>8 (3.4)</b><br><b>11 (4.7)</b>            |
| Topical steroids unpreserved<br>preserved  | 52 (59.1)<br>13 (14.8)             | 16 (47.1)<br>8 (23.5)               | 10 (14.9)<br>14 (20.9)             | 13 (31.0)<br>8 (19.1)               | 7 (16.7)<br>14 (33.3)             | 1 (50.0)<br>1 (50.0)               | 5 (45.5)<br>0                        | <b>84 (36.1)</b><br><b>42 (18.0)</b>         |
| Serum drops unpreserved<br>preserved       | 12 (13.6)<br>0                     | 4 (11.8)<br>0                       | 2 (3.0)<br>1 (1.5)                 | 0<br>0                              | 0<br>0                            | 0<br>0                             | 0<br>0                               | <b>14 (6.0)</b><br><b>1 (0.4)</b>            |
| Systemic steroids                          | 13 (14.8)                          | 2 (5.9)                             | 4 (6.0)                            | 4 (9.5)                             | 0                                 | 0                                  | 2 (18.2)                             | <b>22 (9.5)</b>                              |
| Phototherapeutic keratectomy (PTK)         | 6 (6.8)                            | 2 (5.9)                             | 3 (4.5)                            | 0                                   | 4 (9.5)                           | 0                                  | 0                                    | <b>13 (5.6)</b>                              |
| Therapeutic contact lens                   | 30 (34.1)                          | 16 (47.1)                           | 9 (13.4)                           | 4 (9.5)                             | 20 (47.6)                         | 2 (100.0)                          | 3 (27.3)                             | <b>63 (27.0)</b>                             |
| Epithelial scrape                          | 12 (13.6)                          | 3 (8.8)                             | 2 (3.0)                            | 1 (2.4)                             | 3 (7.1)                           | 0                                  | 1 (9.1)                              | <b>17 (7.3)</b>                              |
| Epithelial scrape and polish               | 1 (1.1)                            | 0                                   | 1 (1.5)                            | 0                                   | 2 (4.8)                           | 0                                  | 0                                    | <b>4 (1.7)</b>                               |
| Other previous treatments *                | 41 (46.6)                          | 11 (32.4)                           | 30 (44.8)                          | 17 (40.5)                           | 14 (33.3)                         | 0                                  | 6 (54.6)                             | <b>95 (40.8)</b>                             |

PED persistent epithelial defect, LSCD limbal stem cell deficiency, OSR ocular surface reconstruction, CHEM chemical/thermal injury, BK bullous keratopathy, TRAB trabeculectomy

**Appendix 4.** Postoperative treatment according to main indication

| <b>Postoperative Treatment</b>              | <b>PED<br/>n = 52<br/>(% of n)</b> | <b>LSCD<br/>n = 19<br/>(% of n)</b> | <b>OSR<br/>n = 44<br/>(% of n)</b> | <b>CHEM<br/>n = 28<br/>(% of n)</b> | <b>BK<br/>n = 27<br/>(% of n)</b> | <b>TRAB<br/>n = 2<br/>(% of n)</b> | <b>OTHER<br/>n = 4<br/>(% of n)</b> | <b>All procedures<br/>(n=141)<br/>(% of n)</b> |
|---------------------------------------------|------------------------------------|-------------------------------------|------------------------------------|-------------------------------------|-----------------------------------|------------------------------------|-------------------------------------|------------------------------------------------|
| Lubrication: unpreserved<br>preserved       | 12 (23.1)<br>4 (7.7)               | 1 (5.3)<br>6 (31.6)                 | 6 (13.6)<br>8 (18.2)               | 1 (3.6)<br>3 (10.7)                 | 4 (14.8)<br>2 (7.4)               | 0<br>0                             | 1 (25.0)<br>0                       | 22 (15.6)<br>15 (10.6)                         |
| Hypertonic agents: unpreserved<br>preserved | 1 (1.9)<br>0                       | 0<br>0                              | 0<br>0                             | 0<br>0                              | 0<br>0                            | 0<br>0                             | 0<br>0                              | 1 (0.7)<br>0                                   |
| Topical steroids: unpreserved<br>preserved  | 21 (40.4)<br>11 (21.2)             | 6 (31.6)<br>9 (47.4)                | 16 (36.4)<br>15 (34.1)             | 8 (28.6)<br>6 (21.4)                | 8 (29.6)<br>7 (25.9)              | 2 (100.0)<br>0                     | 2 (50.0)<br>1 (25.0)                | 51 (36.2)<br>35 (24.8)                         |
| Serum drops: unpreserved<br>preserved       | 5 (9.6)<br>0                       | 4 (21.1)<br>0                       | 2 (4.6)<br>0                       | 3 (10.7)<br>0                       | 0<br>0                            | 0<br>0                             | 0<br>0                              | 9 (6.4)<br>0                                   |
| Systemic steroids                           | 5 (9.6)                            | 1 (5.3)                             | 5 (11.4)                           | 0                                   | 1 (3.7)                           | 0                                  | 0                                   | 11 (7.8)                                       |
| Other immunomodulator                       | 7 (13.5)                           | 4 (21.1)                            | 3 (6.8)                            | 1 (3.6)                             | 0                                 | 0                                  | 0                                   | 10 (7.1)                                       |
| Phototherapeutic keratectomy (PTK)          | 0                                  | 0                                   | 0                                  | 0                                   | 0                                 | 0                                  | 0                                   | 0                                              |
| Therapeutic contact lens                    | 8 (15.4)                           | 5 (26.3)                            | 7 (15.9)                           | 5 (17.9)                            | 8 (29.6)                          | 0                                  | 1 (25.0)                            | 24 (17.0)                                      |
| Epithelial scrape                           | 0                                  | 0                                   | 0                                  | 0                                   | 0                                 | 0                                  | 0                                   | 0                                              |
| Bowman's membrane polish                    | 0                                  | 0                                   | 0                                  | 0                                   | 0                                 | 0                                  | 0                                   | 0                                              |
| Other postoperative treatments *            | 15 (28.9)                          | 6 (31.6)                            | 16 (36.4)                          | 5 (17.9)                            | 8 (29.6)                          | 1 (50.0)                           | 1 (25.0)                            | 41 (29.1)                                      |

PED persistent epithelial defect, LSCD limbal stem cell deficiency, OSR ocular surface reconstruction, CHEM chemical/thermal injury, BK bullous keratopathy, TRAB trabeculectomy
